# Supplementary material
Source: PubMed Central journal article supplement (PMC8366510)
Supplement: NIHMS1729970-supplement-1.pdf [file NIHMS1729970-supplement-1.pdf]

## Supplemental Figures

**Table S1. Primers used for assay development.** Open reading frame (ORF) primers were used to amplify the respective FcaGHV1 genes. The pKH3 primers were used to confirm sequence of plasmid constructs. The restriction sites are underlined. Fwd= forward primer, Rev= reverse primer.

| Gene    |     | Primers                                             |
|---------|-----|-----------------------------------------------------|
| pKH3    | Fwd | 5'- CAACTGCACCTCGGTTCTA -3'                         |
|         | Rev | 5'- CCATTATAAGCTGCAATAAACAAGT -3'                   |
| ORF17.5 | Fwd | 5'- AGACGCTGATCAATGGCCACTAATGCCAG -3'               |
|         | Rev | 5'- CCTGAATTCCTATTAGTTTTTTAGAAAGTTCTTCACAAAATA -3'  |
| ORF26   | Fwd | 5'- CGCGGATCCATGCAAGTTGATAAAAAAATCATAGTC -3'        |
|         | Rev | 5'- CCGGAATTCCTACTAGATGGACAACCAGCCT -3'             |
| ORF38   | Fwd | 5'- CGCGGATCCATGGGTATCATCTGCTCTATTT -3'             |
|         | Rev | 5'- CCGGAATTCCTATCAGATACTAAATACAACCTTCTTTTTTATC -3' |
| ORF42   | Fwd | 5'- CGCGGATCCATGGACTCTGTAATCCGAACC -3'              |
|         | Rev | 5'- CCTGAATTCCTATTATGAAAAGATTTGTA CTAGGCTT -3'      |
| ORF52   | Fwd | 5'- CGCGGATCCATGGCTTCTAAAAAAGGAACACC -3'            |
|         | Rev | 5'- CCTGAATTCCTATTAGGTTGGTTGTTTGGATCTAC -3'         |
| ORF59   | Fwd | 5'- CGCGGATCCATGGAAGCTAAAATTACTACTACTA -3'          |
|         | Rev | 5'- CCGGAATTCCTATTATGTTGTAATCTTGGAATGTTTTG -3'      |
| ORF65   | Fwd | 5'- CGCGGATCCATGAGTAGGGAACAGTTAAGAG -3'             |
|         | Rev | 5'- CCGGAATTCCTATTATTTTTTTTTGCTTCCACTAGTTG -3'      |

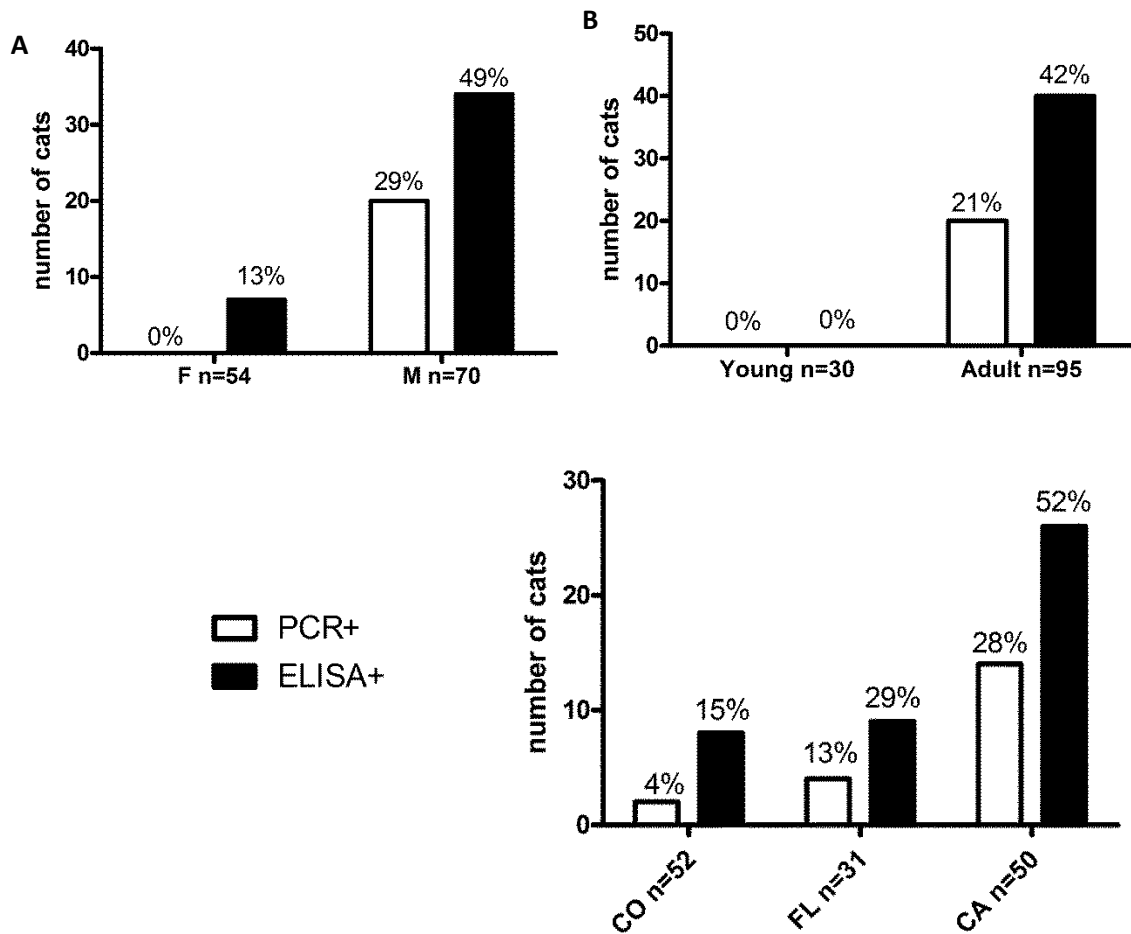

**Figure S1. FcaGHV1 ELISA enhances infection detection across geography, sex, and age categories.** A. Assay comparison by sex: male (M) and female (F). Unknown sex not shown: n=9. B. Assay comparison by age. Unknown age not shown: n=8. C. Comparison of assay results by location: Colorado, Florida, and California.
